# Supplementary material for: Arsenite to Arsenate Oxidation and Water Disinfection via Solar Heterogeneous Photocatalysis: A Kinetic and Statistical Approach
Source: MDPI journal article supplement (doi:10.3390/w14152450), 2022-08-08
Supplement: s1 [file s1]

**Water - MDPI**  
**Supporting Information for manuscript**

**Arsenite to Arsenate Oxidation and Water Disinfection via Solar Heterogeneous  
Photocatalysis: A Kinetic and Statistical Approach**

**Felipe de J. Silerio-Vázquez<sup>1</sup>, Cynthia M. Núñez-Núñez<sup>2</sup>, José B. Proal-Nájera<sup>3,\*</sup> and María T. Alarcón-Herrera<sup>1,\*</sup>**

<sup>1</sup> Departamento de Ingeniería Sustentable, Centro de Investigación en Materiales Avanzados, S.C. Calle CIMAV 110, Colonia 15 de Mayo, Durango 34147, México

<sup>2</sup> Ingeniería en Tecnología Ambiental, Universidad Politécnica de Durango, Carretera Durango-México km 9.5, Durango 34300, México

<sup>3</sup> Instituto Politécnico Nacional, CIIDIR-Durango, Calle Sigma 119, Fraccionamiento 20 de Noviembre II, Durango 34220, México

\* Correspondence: jproal@ipn.mx (J.B.P.-N.); teresa.alarcon@cimav.edu.mx (M.T.A.-H.); Tel.: +52-618-1341781 (J.B.P.-N.); +52-614-4394896 (M.T.A.-H.);

**S1 Ferric chloride dose determination.**

Multiple linear regression has been reported as a tool to find optimal dosage for coagulant [1–3]; in the present experiment, simple linear regression analysis was used to find the optimum ferric chloride (FeCl<sub>3</sub>) dose. 0.5 L of groundwater were spiked with a sodium arsenite (NaAsO<sub>2</sub>; J.T. Baker, USA, CAS: 7784-46-5) solution to increase arsenite (As<sup>III</sup>) concentration in 300 µg /L; groundwater already had an arsenic (As) concentration of 51.52 µg/L (46.06 µg/L of As<sup>III</sup> and 5.46 µg/L of As<sup>V</sup>). Different doses were assessed in a coagulation-flocculation experiment following a jar test protocol with rapid mixing (400 rpm) for 1 min, followed by slow mixing (20 rpm) for 10 min, and 20 min for settling [4]. After settling, As concentration in the supernatant was quantified by graphite furnace atomic absorption spectroscopy (GH-AAS). Table S1 shows the different testes dosages, as well as the As concentration in the supernatant.

Table S1. FeCl<sub>3</sub> dose and As concentration in the supernatant.

| FeCl <sub>3</sub> (mg / L) | As <sup>III</sup> (µg / L) |
|----------------------------|----------------------------|
| 7.68                       | 1.93                       |
| 3.84                       | 4.44                       |
| 1.92                       | 15.53                      |
| 0.96                       | 70.23                      |
| 0.48                       | 301.07                     |
| 0.24                       | 341.97                     |
| 0                          | 365.43                     |

Data was fitted to exponential regression equation, as show in Equation S1

$$y = \alpha \times e^{\beta \times x} \quad (\text{S1})$$

Coefficient of determination ( $R^2$ ) was 0.90; coefficients were calculated with regression analysis:  $\alpha = 211.92$ , and  $\beta = -1.442$ . To attain an As concentration lower than  $10 \mu\text{g} / \text{L}$ ,  $2.19 \text{ mg} / \text{L FeCl}_3$  is needed.

## References

1. Laky, D. Predictive model for drinking water treatment technology design – the efficiency of arsenic removal by in-situ formed ferric-hydroxide. *Period. Polytech. Civ. Eng.* **2010**, *54*, 45, doi:10.3311/pp.ci.2010-1.05.
2. Tshukudu, T.; Zheng, H.; Yang, J. Optimization of Coagulation with PFS-PDADMAC Composite Coagulants Using the Response Surface Methodology Experimental Design Technique. *Water Environ. Res.* **2013**, *85*, 456–465, doi:10.2175/106143012X13560205144515.
3. Corral Bobadilla, M.; Lorza, R.; Escribano García, R.; Somovilla Gómez, F.; Vergara González, E. Coagulation: Determination of Key Operating Parameters by Multi-Response Surface Methodology Using Desirability Functions. *Water* **2019**, *11*, 398, doi:10.3390/w11020398.
4. Laky, D.; Licskó, I. Arsenic removal by ferric-chloride coagulation – effect of phosphate, bicarbonate and silicate. *Water Sci. Technol.* **2011**, *64*, 1046–1055, doi:10.2166/wst.2011.419.
